# Supplementary material for: Wind and wave dataset for Matara, Sri Lanka
Source: Copernicus journal article supplement (doi:10.5194/essd-2017-87), 2017-08-22
Supplement: Supplementary file [file essd-2017-87-AC4-supplement.pdf]

Dear **Anonymous Referee #2**

We thank **Anonymous Referee #2** for their thoughtful and constructive comments which have substantially improved the clarity and accuracy of the manuscript. We have addressed all comments as follows:

- 1) It is suggested that the paper should add a brief description of instruments used for the measurements of the parameters, including the type, manufacturer of the instruments and resolution for measuring each parameter.

*Added already some description in table 2.*

- 2) For Figure 2, it is suggested to give an overview picture of AWS location and its surrounding environment.

*Agreed. But we don't visit our observation station now. We will get new picture in next week.*

- 3) "which hosts the busiest shipping lanes in the world" is suggested to be revised as "which hosts one of the busiest shipping lanes in the world".

*Agreed.*

*Text rewritten as: "which hosts one of the busiest shipping lanes in the world".*

- 4) "IFS improvements", what "IFS" is referred to?

*Agreed.*

*IFS (Integrated Forecast System) is a system of ERA-Interim.*

- 5) "water level every 10 min at a water depth of 20 m", it is not clearly expressed.

*According to RC1's comments, the part has been showed in a Table.*

- 6) "therefore, there are significant errors in the measurements, especially for MWD.", why the errors are caused by measurements, not by the modeling or reanalysis?

*This is an error. It's "there are significant errors in the measurements", but "there are significant errors in the comparison".*

*In line 165, we can know that the errors should be caused by the modeling or reanalysis, not measurements*

- 7) For the term "wind sea", please check whether it is a standard term.

*There are a sever ways in public research paper: wind sea, wind wave, waves for "wind sea". We choose the "wind sea". The main reason is that "wind sea" distinguish it from swell.*

- 8) English needs further polishing before it is finally published.

*We plan to ask professional editors to polish the final manuscript.*

Yao Luo
